# Supplementary material
Source: HighWire-hosted journal article supplement (https://bmjopen.bmj.com/content/13/7/e064219)
Supplement: inline-supplementary-material-1 [file inline-supplementary-material-1.pdf]

Online supplement

**Higher risk of future events, mortality, and greater healthcare use among patients with increasingly recurrent atherosclerotic cardiovascular disease events in Taiwan: a retrospective cohort study**

Chia-Yun Hsu<sup>1</sup>, Wen-Jone Chen<sup>2</sup>, Hung-Ju Lin<sup>2</sup>, Ho-Min Chen<sup>1</sup>, Yea-Harn Yang<sup>3</sup>, Wei-Ju Chen<sup>3</sup>, Chieh-Min Chen<sup>4</sup>, Fei-Yuan Hsiao<sup>4,5,6\*</sup>

Contents

**Table of Contents**

Supplement 1 (Figure). Definition of subsequent events .....2

Supplement 2 (Figure). Selection flow of study population .....3

Supplement 3 (Figure). Recurrent event types by index events type .....5

Supplement 4 (Table). Probability of survival estimated by Kaplan–Meier method .....6

Supplement 5 (Table). Cumulative incidence rate of recurrent events considering competing risk estimated by Fine and Gray method .....7

Supplement 6 (Figure). Percentage of patients having cardiovascular-related healthcare use following each event. ....8

Supplement 7 (Figure). Percentage of patients prescribed with statin following each event .....9

## Supplement 1 (Figure). Definition of subsequent events

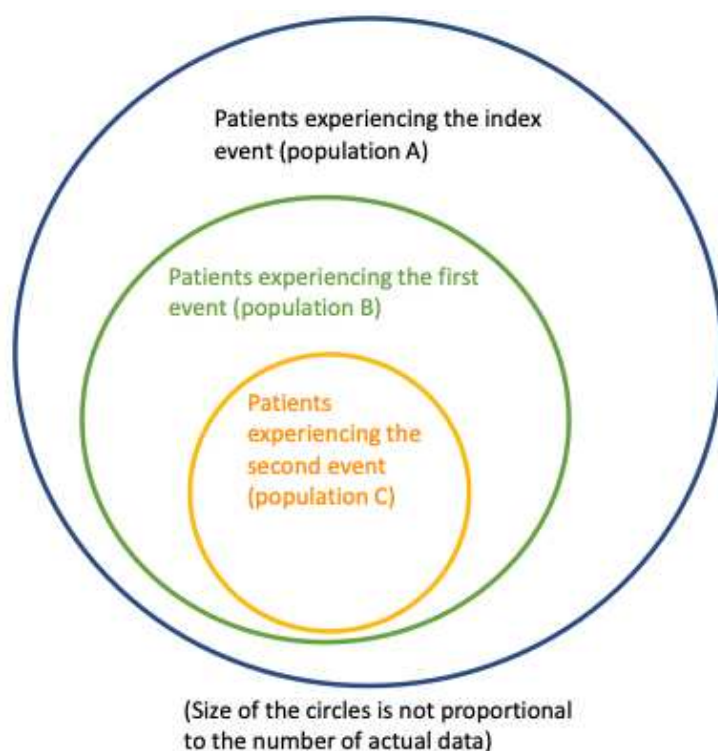

Patients with an index event (population A), were further defined into subsets if they experienced a first recurrent event (population B) and a second recurrent event (population C). Post-event mortality was calculated and compared between each of these populations.

## Supplement 2 (Figure). Selection flow of study population

## (a) Patients with new-onset CHD

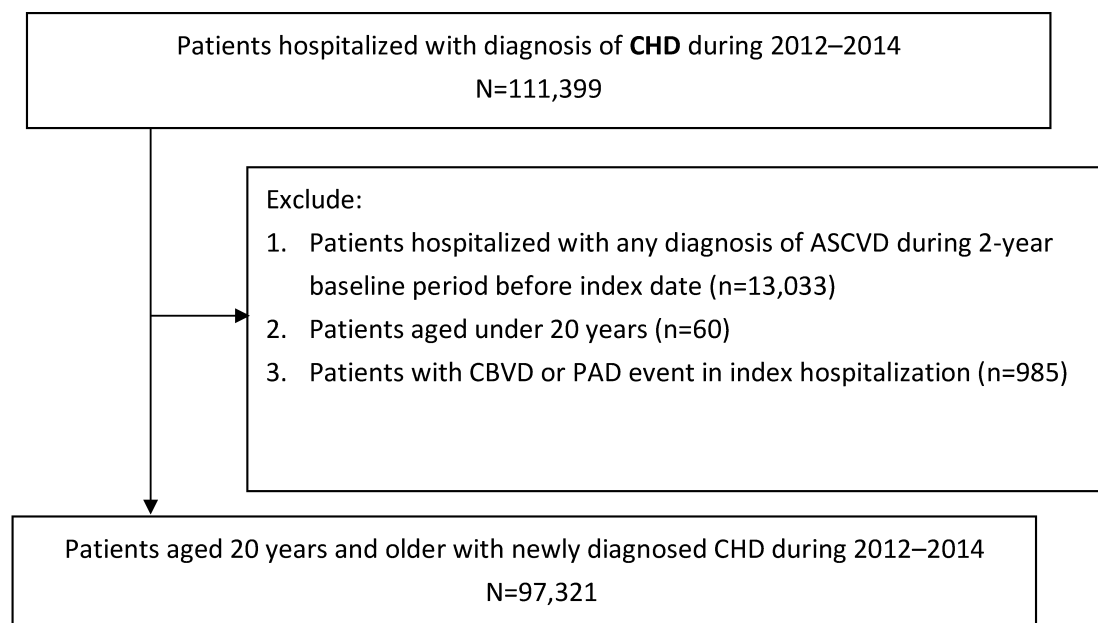

## (b) Patients with new-onset CBVD

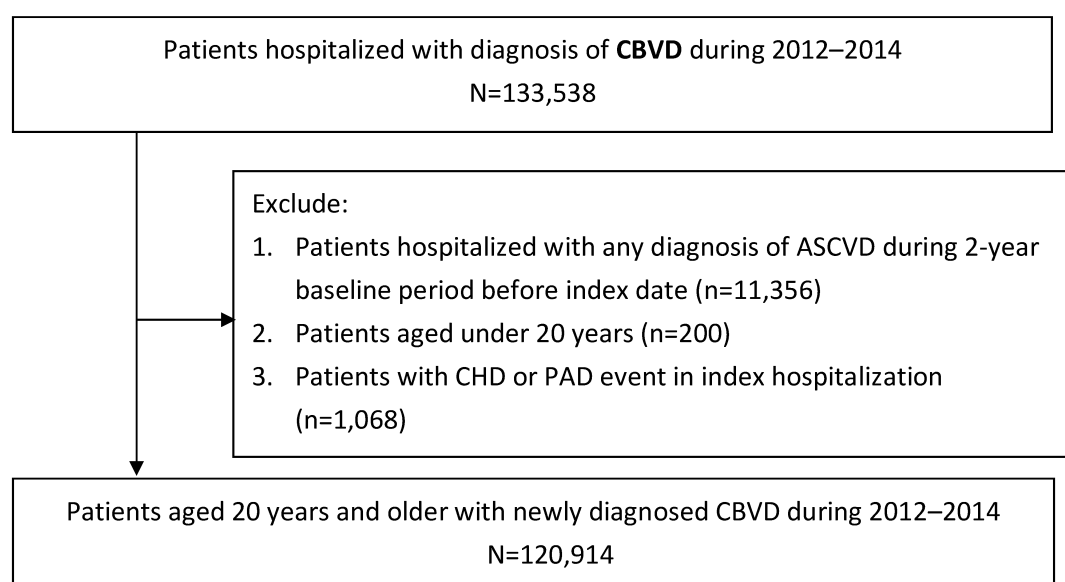

(c) Patients with new-onset PAD

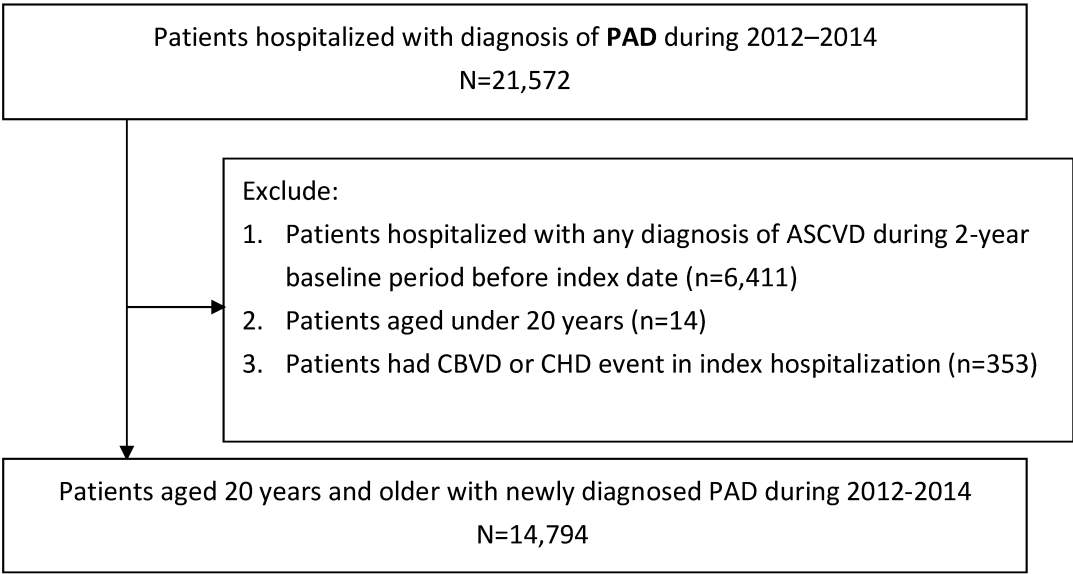

CBVD, cerebrovascular disease; CHD, coronary heart disease PAD, peripheral artery disease

Supplement 3 (Figure). Recurrent event types by index events type

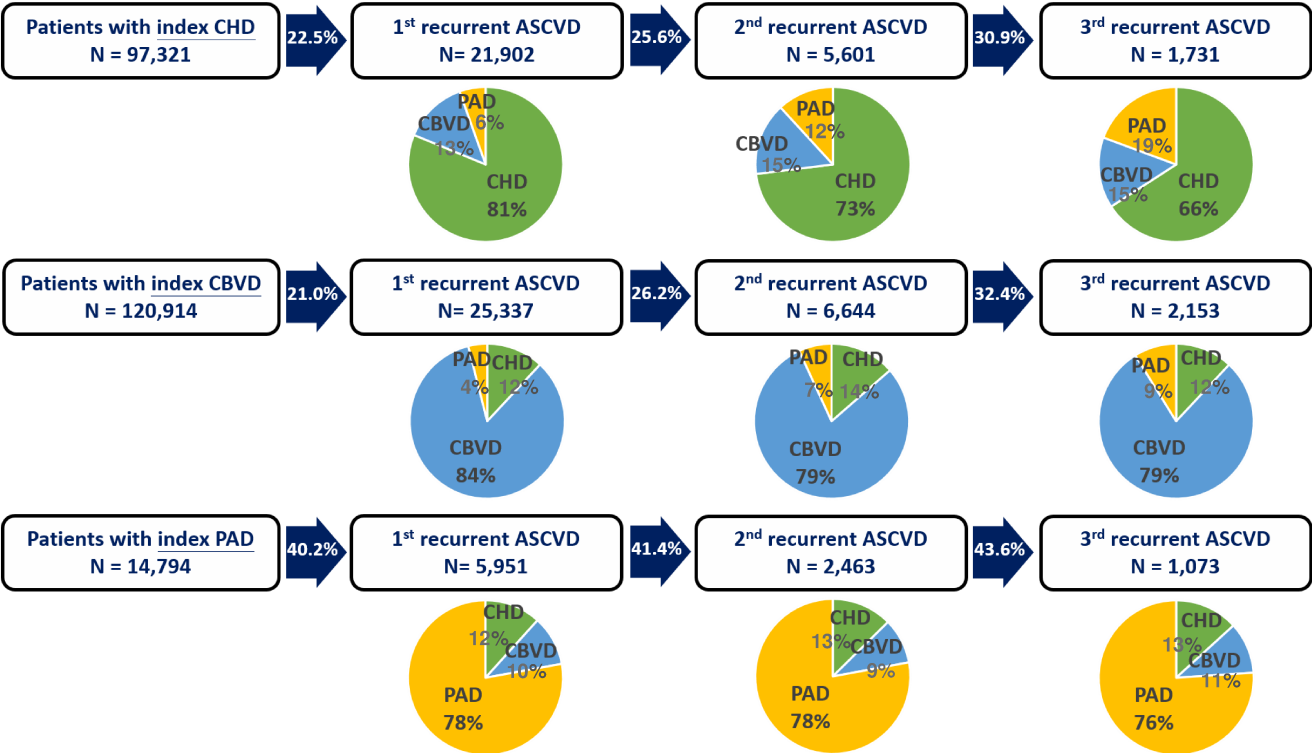

ASCVD: atherosclerotic cardiovascular disease; CBVD: cerebrovascular disease; CHD: coronary heart disease; PAD: peripheral artery disease

## Supplement 4 (Table). Probability of survival estimated by Kaplan–Meier method

|                           | Patients, n | Deaths, n | (%)    | Probability of survival |       |       |       |
|---------------------------|-------------|-----------|--------|-------------------------|-------|-------|-------|
|                           |             |           |        | 6 mo                    | 12 mo | 18 mo | 24 mo |
| Coronary heart disease    |             |           |        |                         |       |       |       |
| Index event               | 97,321      | 21,773    | (22.4) | 0.889                   | 0.859 | 0.836 | 0.815 |
| First recurrent event     | 21,902      | 4,769     | (21.8) | 0.887                   | 0.844 | 0.811 | 0.784 |
| Second recurrent event    | 5,601       | 1,376     | (24.6) | 0.856                   | 0.798 | 0.753 | 0.716 |
| Cerebrovascular disease   |             |           |        |                         |       |       |       |
| Index event               | 120,914     | 32,125    | (26.6) | 0.899                   | 0.859 | 0.824 | 0.792 |
| First recurrent event     | 25,337      | 6,540     | (25.8) | 0.881                   | 0.830 | 0.787 | 0.750 |
| Second recurrent event    | 6,644       | 1,528     | (23.0) | 0.884                   | 0.833 | 0.795 | 0.753 |
| Peripheral artery disease |             |           |        |                         |       |       |       |
| Index event               | 14,794      | 6,217     | (42.0) | 0.842                   | 0.770 | 0.713 | 0.665 |
| First recurrent event     | 5,951       | 2,412     | (40.5) | 0.821                   | 0.737 | 0.672 | 0.622 |
| Second recurrent event    | 2,463       | 924       | (37.5) | 0.817                   | 0.725 | 0.663 | 0.607 |

mo, months.

Supplement 5 (Table). Cumulative incidence rate of recurrent events considering competing risk estimated by Fine and Gray method

|                           | Patients, n | Events, n | (%)    | Event rate |       |       |       |
|---------------------------|-------------|-----------|--------|------------|-------|-------|-------|
|                           |             |           |        | 6 mo       | 12 mo | 18 mo | 24 mo |
| Coronary heart disease    |             |           |        |            |       |       |       |
| Index event               | 97,321      | 21,902    | (22.5) | 0.104      | 0.147 | 0.175 | 0.194 |
| First recurrent event     | 21,902      | 5,601     | (25.6) | 0.134      | 0.196 | 0.237 | 0.263 |
| Second recurrent event    | 5,601       | 1,731     | (30.9) | 0.196      | 0.273 | 0.327 | 0.360 |
| Cerebrovascular disease   |             |           |        |            |       |       |       |
| Index event               | 120,914     | 25,337    | (20.9) | 0.110      | 0.140 | 0.162 | 0.180 |
| First recurrent event     | 25,337      | 6,644     | (26.2) | 0.169      | 0.216 | 0.245 | 0.268 |
| Second recurrent event    | 6,644       | 2,153     | (32.4) | 0.242      | 0.298 | 0.333 | 0.351 |
| Peripheral artery disease |             |           |        |            |       |       |       |
| Index event               | 14,794      | 5,951     | (40.2) | 0.241      | 0.301 | 0.338 | 0.367 |
| First recurrent event     | 5,951       | 2,463     | (41.4) | 0.259      | 0.341 | 0.383 | 0.413 |
| Second recurrent event    | 2,463       | 1,073     | (43.6) | 0.281      | 0.376 | 0.428 | 0.470 |

mo, months.

Supplement 6 (Figure). Percentage of patients having cardiovascular-related healthcare use following each event.

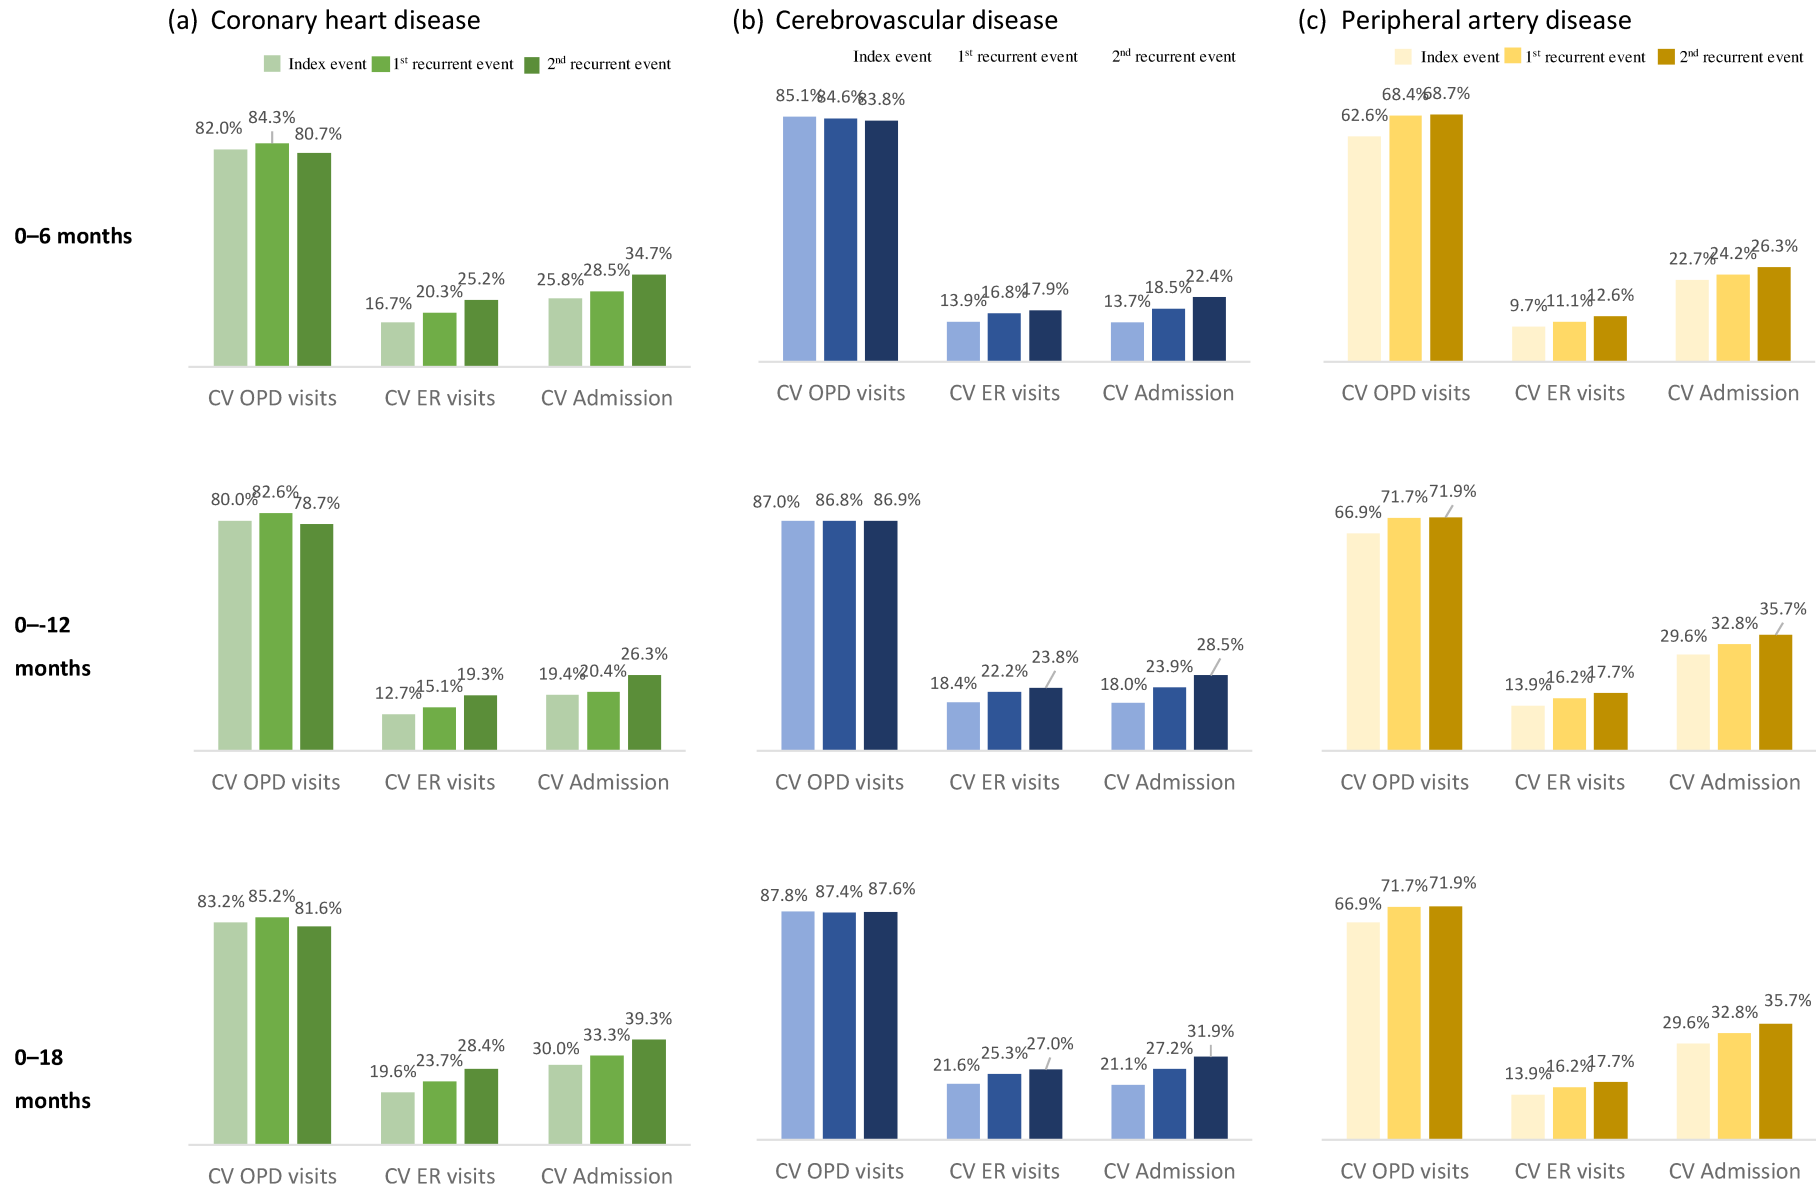



Supplement 7 (Figure). Percentage of patients prescribed with statin following each event

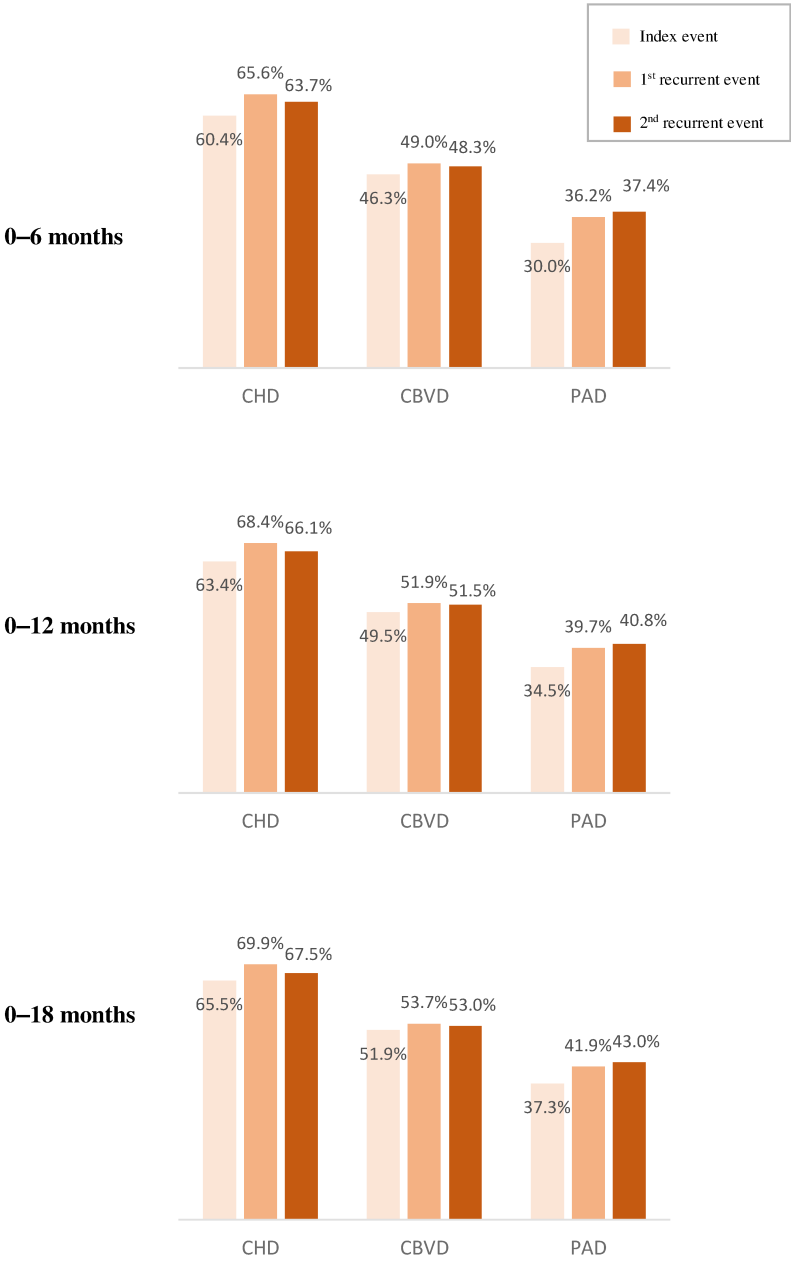

CBVD: cerebrovascular disease; CHD: coronary heart disease; PAD: peripheral artery disease.
